# Supplementary material for: Focal breast edema and breast edema score on T2-weighted images provides valuable biological information for invasive breast cancer
Source: Springer Nature journal article supplement (doi:10.1186/s13244-023-01424-7), 2023-04-30

**Focal breast edema and breast edema score on T2-weighted images provides valuable biological information for invasive breast cancer**

Flowchart of the study enrollment

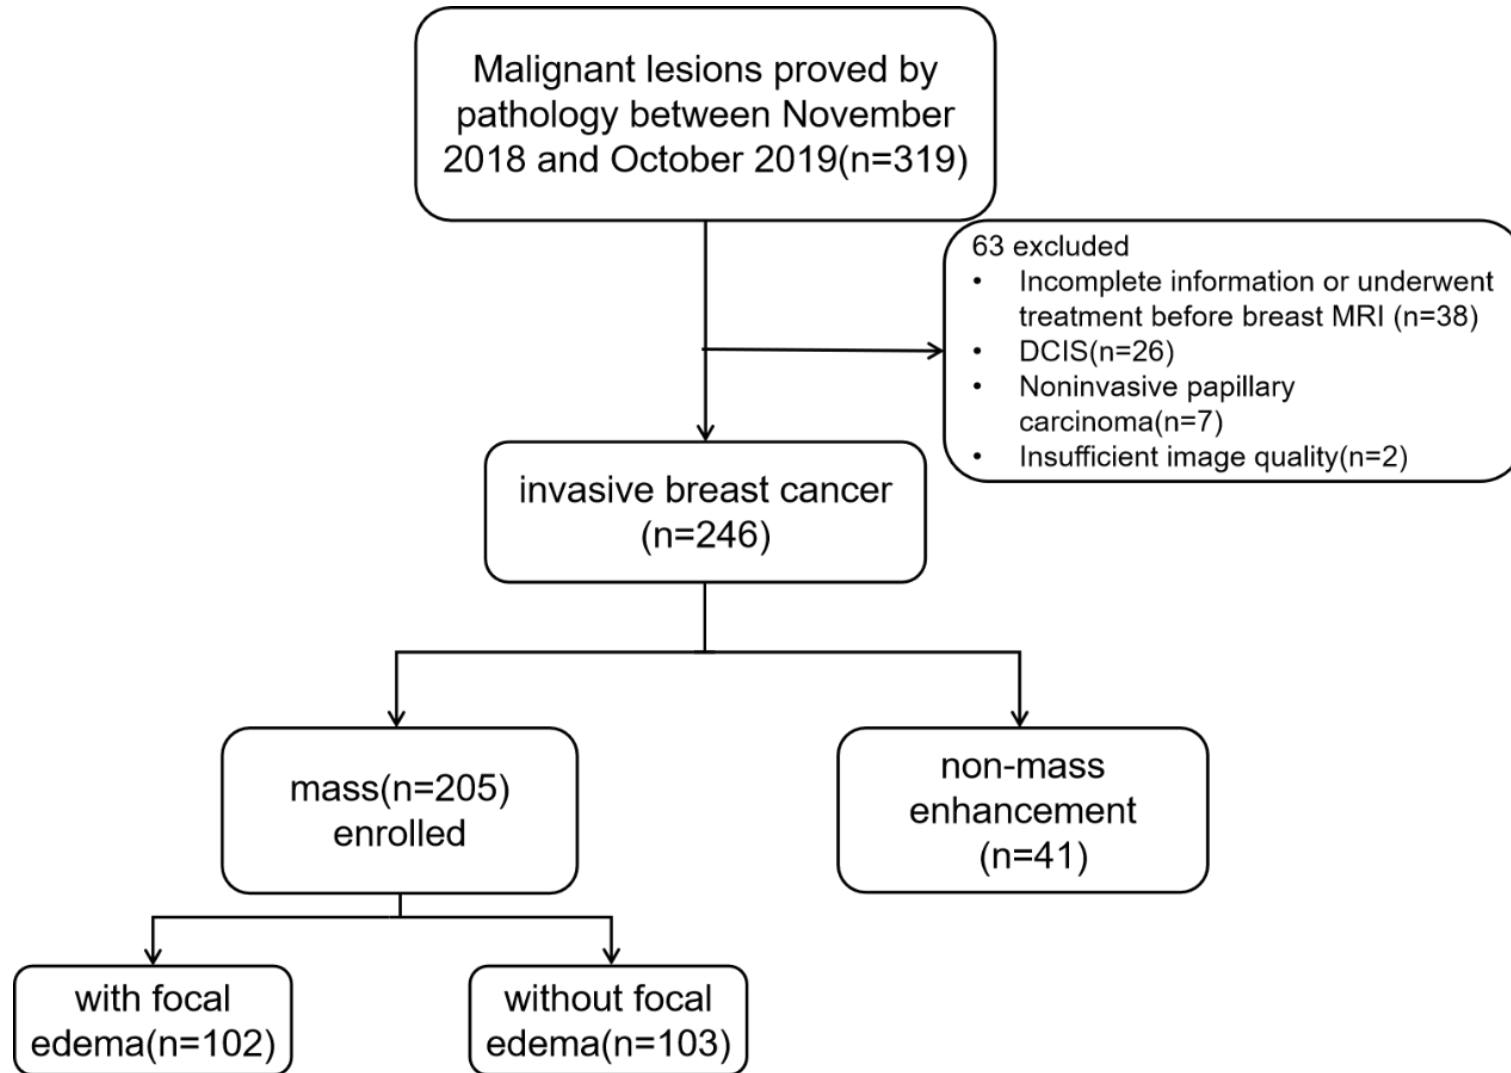

Supplement: MOESM1 [file 13244_2023_1424_MOESM1_ESM.pdf]
